# Supplementary material
Source: Springer Nature journal article supplement (https://www.springermedizin.de/resource/supplementary/12916_2012_664_MOESM6_ESM.pdf/9598018)
Supplement: MOESM6 [file 9598018]

**Std. Mean Difference**  
**IV, Fixed, 95% CI**

**Study or Subgroup**

Siegel (2012)<sup>y</sup> 0.54 [-0.46, 1.55]

**Std. Mean Difference**  
**IV, Fixed, 95% CI**

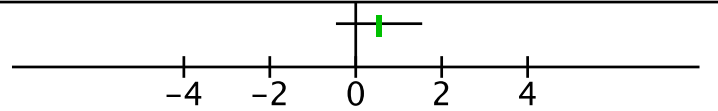

Ice slurry ingestion Cold water immersion
